# Supplementary material for: Stereoselectivity in the Membrane Transport of Phenylethylamine Derivatives by Human Monoamine Transporters and Organic Cation Transporters 1, 2, and 3
Source: MDPI journal article supplement (doi:10.3390/biom12101507), 2022-10-18
Supplement: s1 [file s1]

Supporting information

# Stereoselectivity in the Membrane Transport of Phenylethylamine Derivatives by Human Monoamine Transporters and Organic Cation Transporters 1, 2, and 3

Lukas Gebauer\*, Muhammad Rafehi and Jürgen Brockmöller

Institute of Clinical Pharmacology, University Medical Center Göttingen, D-37075 Göttingen,  
Germany

E-Mail: [lukas.gebauer@med.uni-goettingen.de](mailto:lukas.gebauer@med.uni-goettingen.de)

## Table of contents

Figure S1: Net uptake curves of the norepinephrine transporter (NET)

Figure S2: Net uptake curves of the dopamine transporter (DAT)

Figure S3: Net uptake curves of the serotonin transporter (SERT)

Figure S4: Net uptake curves of the organic cation transporter 1 (OCT1)

Figure S5: Net uptake curves of the organic cation transporter 2 (OCT2)

Figure S6: Net uptake curves of the organic cation transporter 3 (OCT3)

Table S1: HPLC conditions for chiral separation of investigated substances

Table S2: Mass spectrometry detection parameters

Table S3: Kinetic parameters for the stereoselective transport of chiral phenylethylamines by  
MATs and OCTs

Table S4: Stereoselectivity and transporter selectivity of investigated phenylethylamines for  
OCT2 and its A270S variant

## Norepinephrine Transporter (NET)/SLC6A2

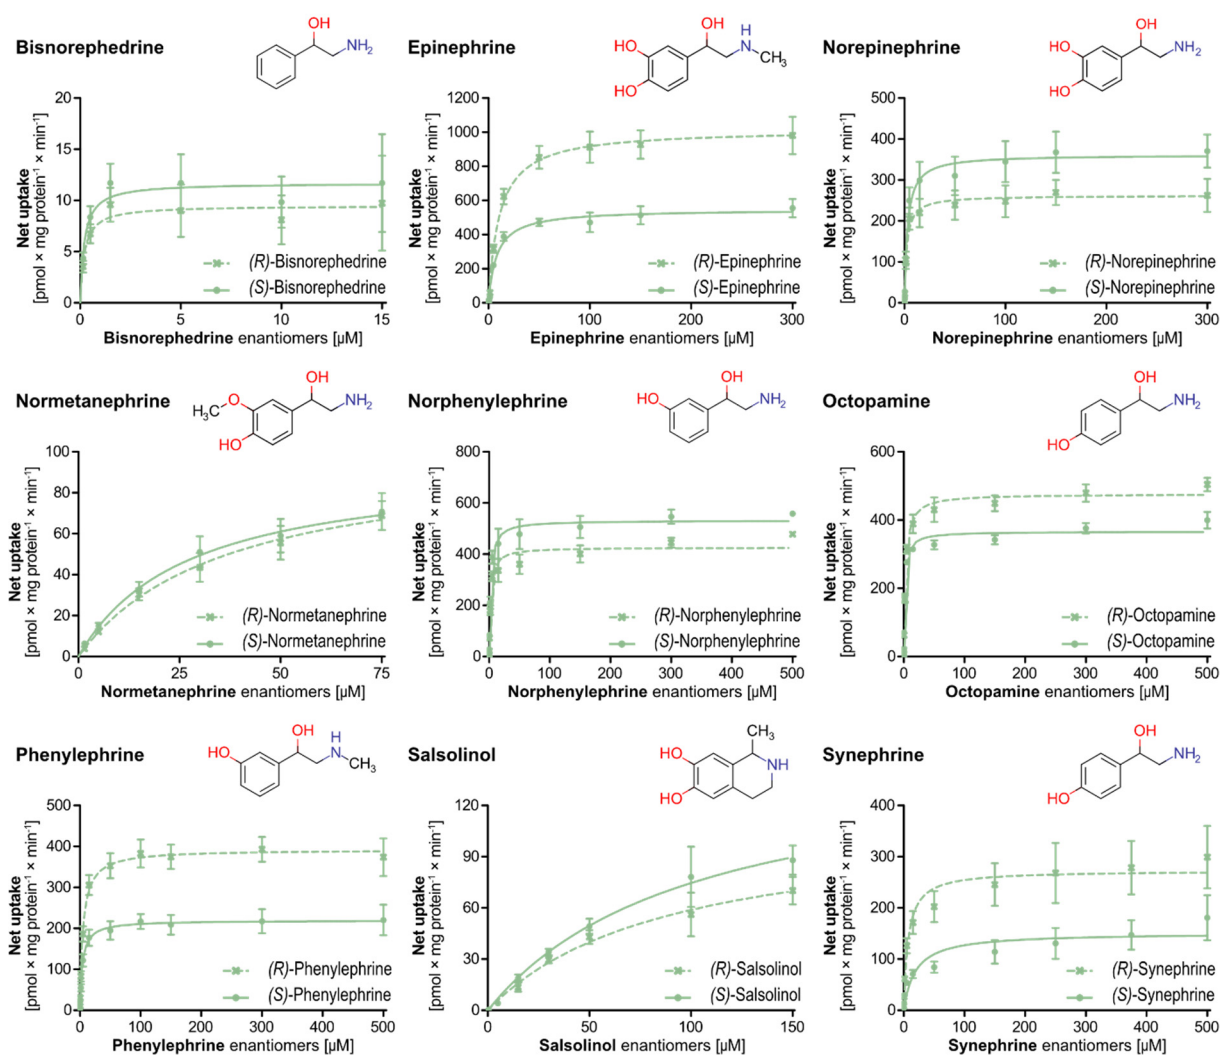

**Figure S1** Net uptake curves of the norepinephrine transporter (NET) for investigated chiral phenylethylamines (in alphabetical order). Data is presented as mean  $\pm$  SEM of at least three independent experiments. Not transported substances (no net uptake) are not shown.

## Dopamine Transporter (DAT)/SLC6A3

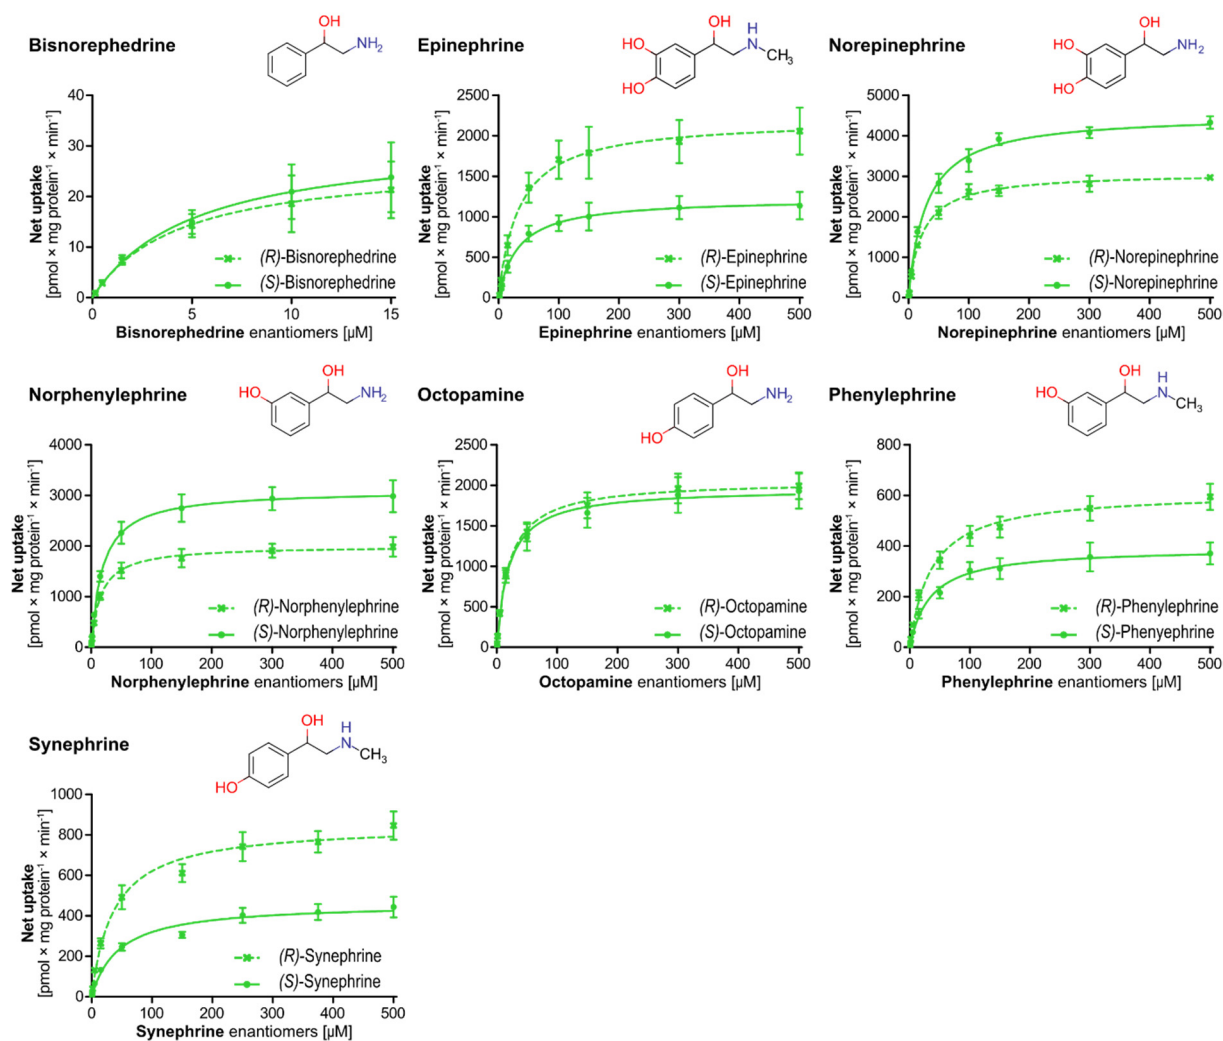

**Figure S2** Net uptake curves of the dopamine transporter (DAT) for investigated chiral phenylethylamines (in alphabetical order). Data is presented as mean  $\pm$  SEM of at least three independent experiments. Not transported substances (no net uptake) are not shown.

## Serotonin Transporter (SERT)/SLC6A4

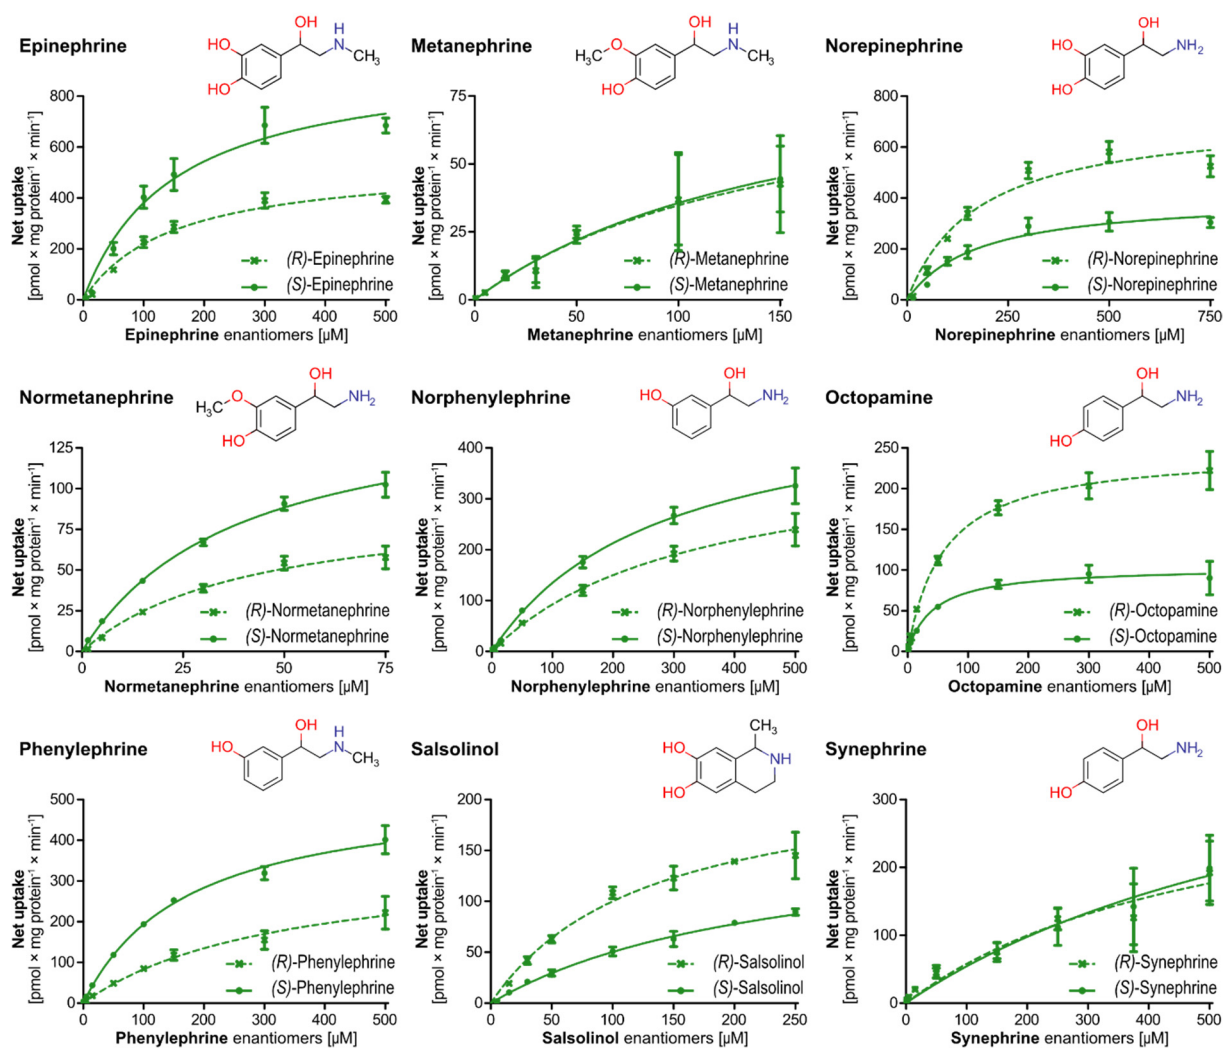

**Figure S3** Net uptake curves of the serotonin transporter (SERT) for investigated chiral phenylethylamines (in alphabetical order). Data is presented as mean ± SEM of at least three independent experiments. Not transported substances (no net uptake) are not shown.

## Organic cation transporter 1 (OCT1)/SLC22A1

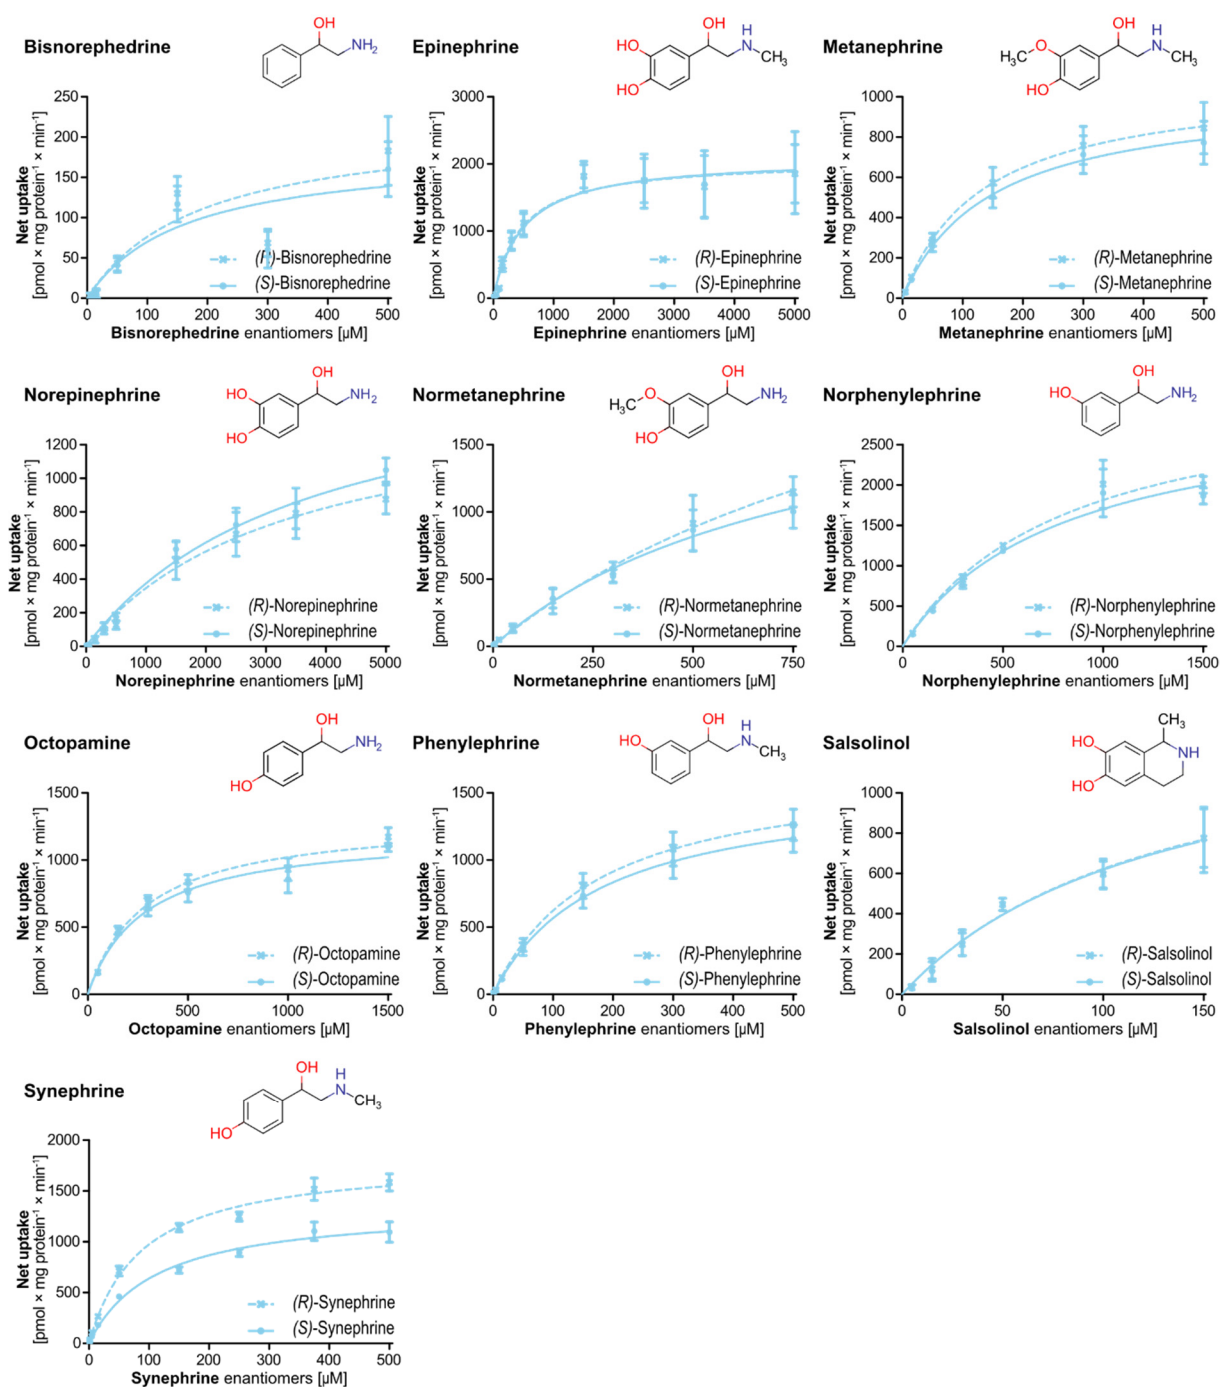

**Figure S4** Net uptake curves of the organic cation transporter 1 (OCT1) for investigated chiral phenylethylamines (in alphabetical order). Data is presented as mean  $\pm$  SEM of at least three independent experiments. Not transported substances (no net uptake) are not shown.

## Organic cation transporter 2 (OCT2)/SLC22A2

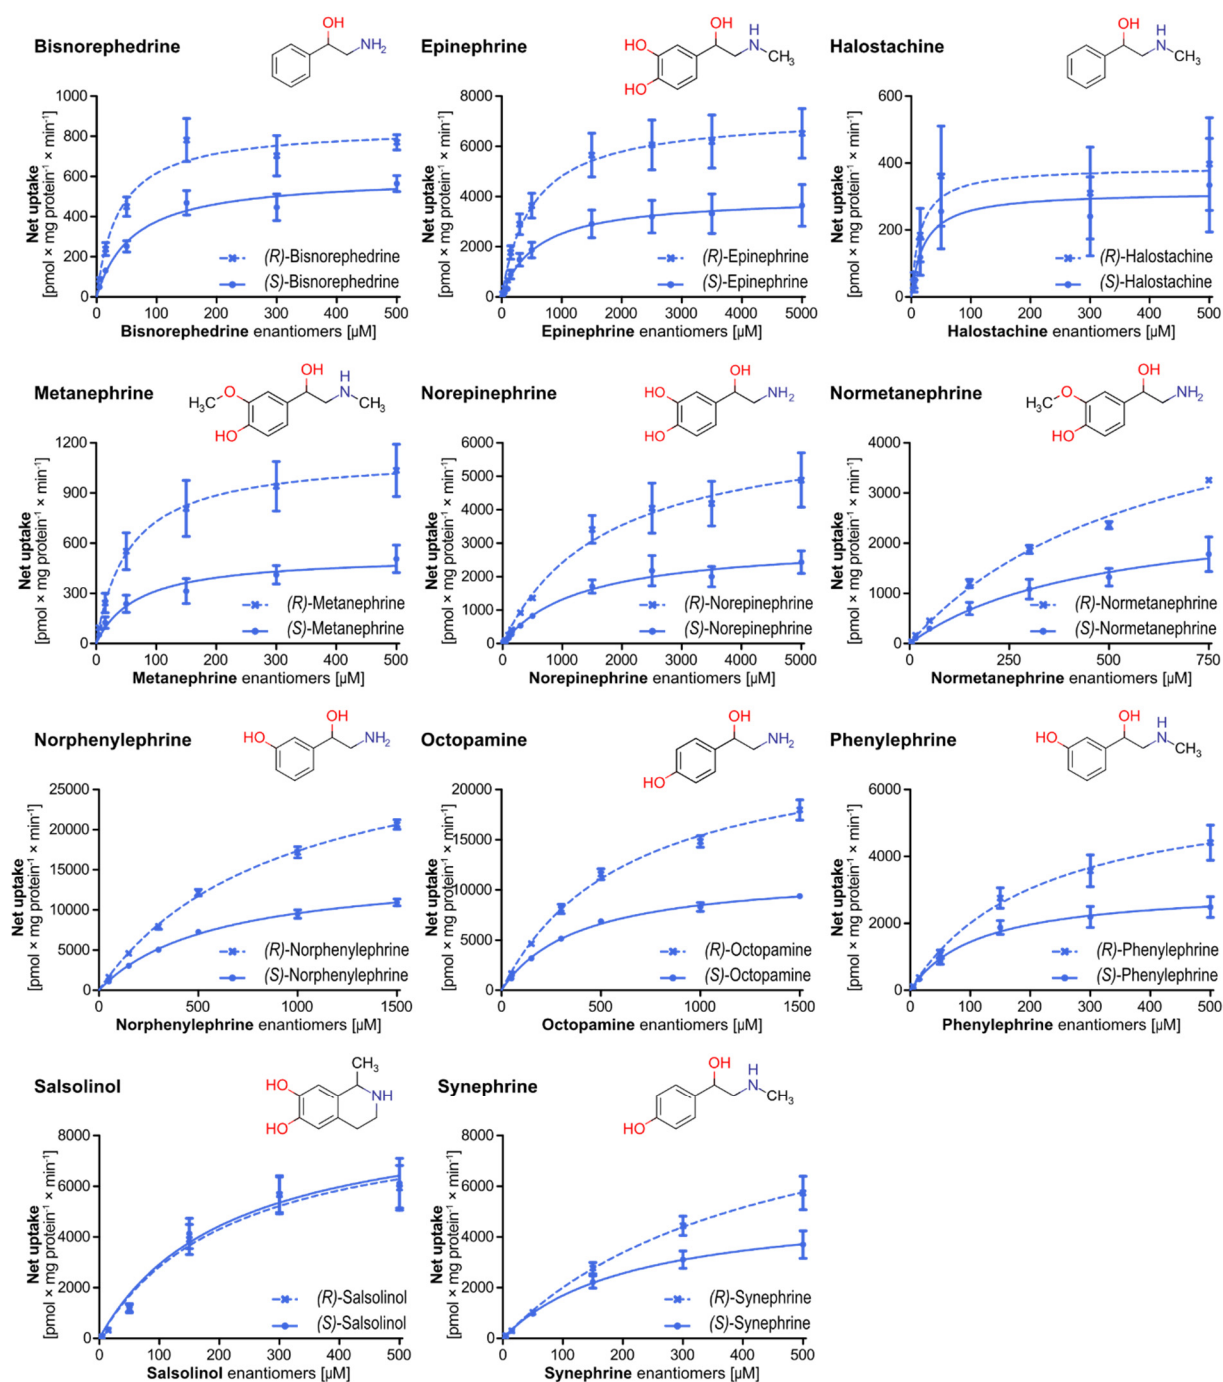

**Figure S5** Net uptake curves of the organic cation transporter 2 (OCT2) for investigated chiral phenylethylamines (in alphabetical order). Data is presented as mean  $\pm$  SEM of at least three independent experiments. Not transported substances (no net uptake) are not shown.



## Organic cation transporter 3 (OCT1)/SLC22A3

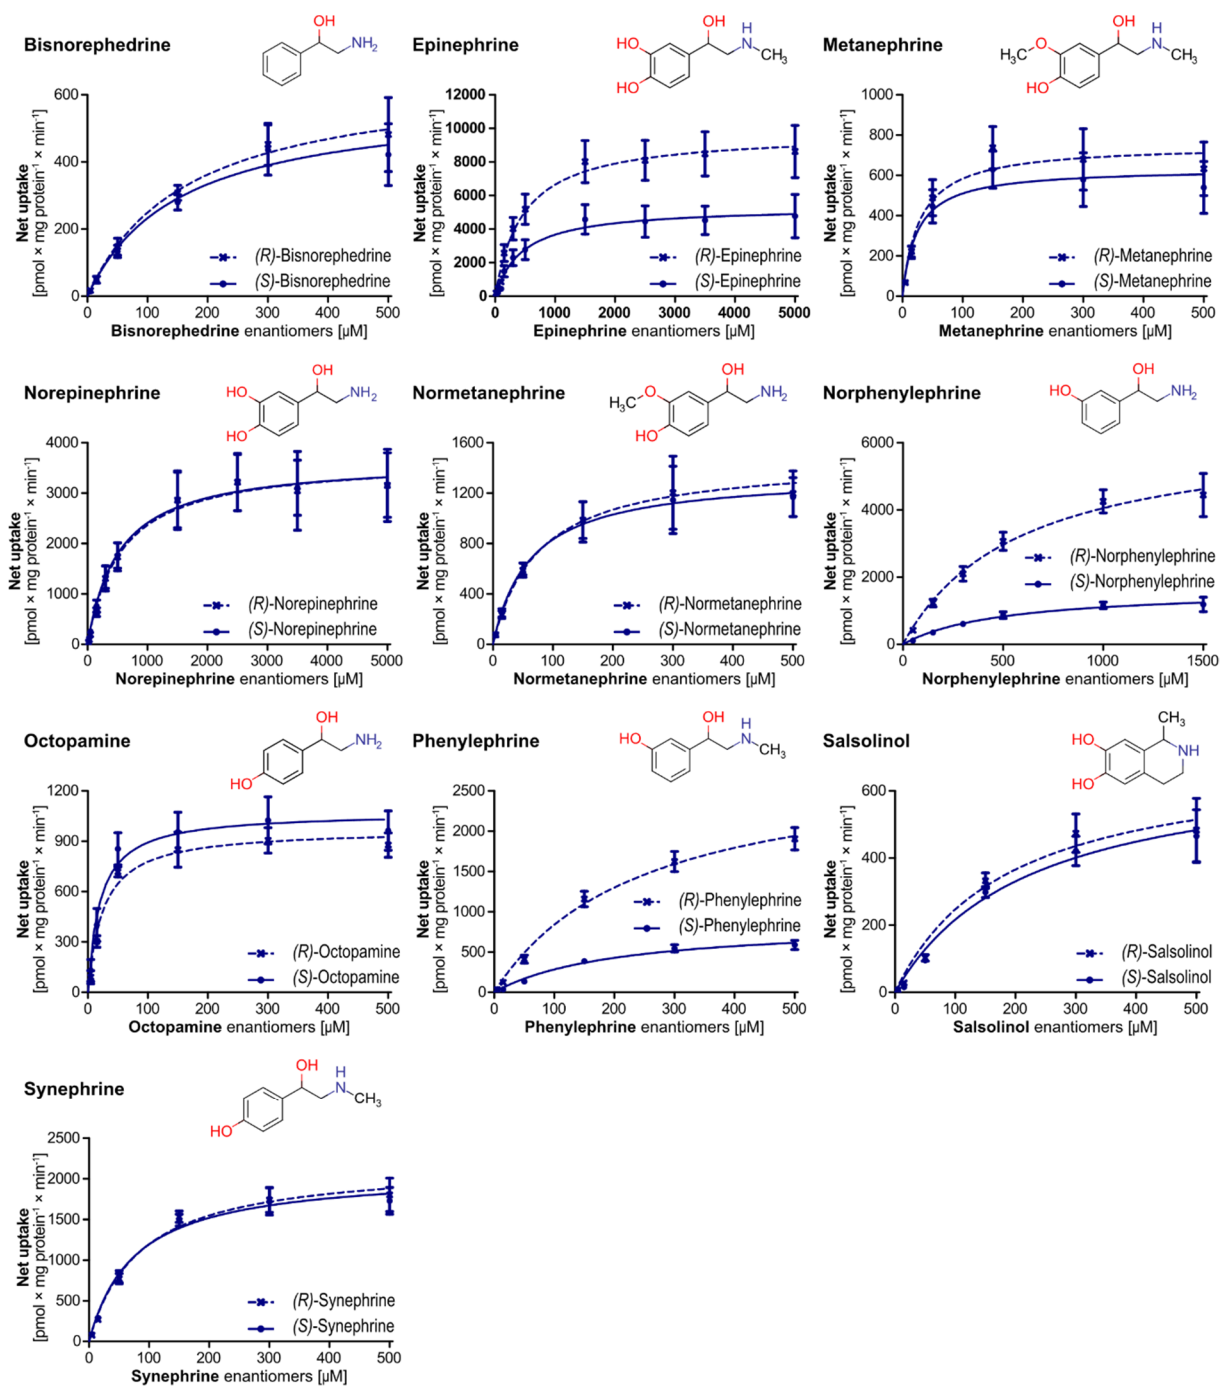

**Figure S6** Net uptake curves of the organic cation transporter 3 (OCT3) for investigated chiral phenylethylamines (in alphabetical order). Data is presented as mean  $\pm$  SEM of at least three independent experiments. Not transported substances (no net uptake) are not shown.

**Table S1** HPLC conditions for chiral separation of investigated substances

| Substance        | Mobile phase composition                       | Flow rate<br>[ $\mu\text{L min}^{-1}$ ] | Temperature<br>[ $^{\circ}\text{C}$ ] | Retention time<br>[min; order of elution] |
|------------------|------------------------------------------------|-----------------------------------------|---------------------------------------|-------------------------------------------|
| Bisnorephedrine  | 10 mM $\text{NH}_4\text{Ac}$ , pH 5.8; 10% IPA | 400                                     | 22                                    | 2.81 / 3.42 [R-S]                         |
| Epinephrine      | 10 mM $\text{NH}_4\text{Ac}$ , pH 5.8; 10% IPA | 300                                     | 22                                    | 3.83 / 4.83 [R-S]                         |
| Halostachine     | 10 mM $\text{NH}_4\text{Ac}$ , pH 5.8; 10% IPA | 300                                     | 22                                    | 3.04 / 3.38 [1-2]                         |
| Metanephrine     | 10 mM $\text{NH}_4\text{Ac}$ , pH 5.8; 10% IPA | 300                                     | 22                                    | 3.74 / 4.26 [1-2]                         |
| Norepinephrine   | 10 mM $\text{NH}_4\text{Ac}$ , pH 5.8; 10% IPA | 400                                     | 22                                    | 3.91 / 5.78 [R-S]                         |
| Normetanephrine  | 10 mM $\text{NH}_4\text{Ac}$ , pH 5.8; 10% IPA | 400                                     | 22                                    | 3.37 / 5.16 [1-2]                         |
| Norphenylephrine | 10 mM $\text{NH}_4\text{Ac}$ , pH 5.8; 10% IPA | 400                                     | 22                                    | 3.30 / 4.33 [1-2]                         |
| Octopamine       | 10 mM $\text{NH}_4\text{Ac}$ , pH 5.8; 10% IPA | 400                                     | 22                                    | 3.31 / 5.36 [R-S]                         |
| Phenylephrine    | 10 mM $\text{NH}_4\text{Ac}$ , pH 5.8; 10% IPA | 400                                     | 22                                    | 2.65 / 3.07 [R-S]                         |
| Salsolinol       | 10 mM $\text{NH}_4\text{Ac}$ , pH 5.0; 10% IPA | 400                                     | 25                                    | 2.16 / 4.23 [1-2]                         |
| Synephrine       | 10 mM $\text{NH}_4\text{Ac}$ , pH 5.8; 10% IPA | 400                                     | 22                                    | 2.60 / 3.27 [R-S]                         |

$\text{NH}_4\text{Ac}$ , ammonium acetate; IPA, isopropyl alcohol



**Table S2** Mass spectrometry detection parameters

| <b>Substance</b> | <b>Mass Q1<sup>a</sup></b><br>[Da] | <b>Mass Q3<sup>b</sup></b><br>[Da] | <b>DP<sup>c</sup></b> [V] | <b>CE<sup>d</sup></b> [V] | <b>CXP<sup>e</sup></b> [V] |
|------------------|------------------------------------|------------------------------------|---------------------------|---------------------------|----------------------------|
| Bisnorephedrine  | 137.890                            | 119.910<br>(63.910)                | 29                        | 12<br>(37)                | 8<br>(12)                  |
| Epinephrine      | 184.100                            | 166.100<br>(135.000)               | 36                        | 13<br>(15)                | 8<br>(10)                  |
| Halostachine     | 152.100                            | 134.000<br>(119.000)               | 41                        | 13<br>(27)                | 8<br>(8)                   |
| Metanephrine     | 198.100                            | 165.000<br>(119.000)               | 41                        | 25<br>(29)                | 8<br>(8)                   |
| Norepinephrine   | 170.200                            | 152.000<br>(107.000)               | 36                        | 10<br>(28)                | 10<br>(20)                 |
| Normetanephrine  | 184.100                            | 166.000<br>(134.000)               | 36                        | 9<br>(25)                 | 10<br>(8)                  |
| Norphenylephrine | 154.180                            | 136.000<br>(91.100)                | 39                        | 11<br>(29)                | 8<br>(16)                  |
| Octopamine       | 154.000                            | 136.000<br>(91.000)                | 36                        | 11<br>(29)                | 8<br>(16)                  |
| Phenylephrine    | 168.120                            | 91.000<br>(77.000)                 | 41                        | 30<br>(56)                | 11<br>(4)                  |
| Salsolinol       | 180.080                            | 117.100<br>(145.200)               | 81                        | 31<br>(25)                | 8<br>(10)                  |
| Synephrine       | 167.691                            | 149.900<br>(135.000)               | 36                        | 35<br>(35)                | 12<br>(8)                  |
| Milnacipran      | 247.174                            | 230.200<br>(100.100)               | 51                        | 17<br>(27)                | 14<br>(8)                  |

Detection parameters for a second substance-specific mass transition used as qualifier are shown in parentheses.

<sup>a</sup>Q1, first quadrupole

<sup>b</sup>Q3, third quadrupole

<sup>c</sup>DP, declustering potential

<sup>d</sup>CE, collision energy

<sup>e</sup>CXP, collision cell exit potential

**Table S3** Kinetic parameters for the stereoselective transport of racemic monoamines by MATs and OCTs

| Transporter | Substrate                    | $K_m \pm \text{SEM}$<br>[ $\mu\text{M}$ ] | $V_{\max} \pm \text{SEM}$<br>[ $\text{pmol} \times \text{mg}$<br>$\text{protein}^{-1} \times$<br>$\text{min}^{-1}$ ] | $Cl_{\text{int}} \pm \text{SEM}$<br>[ $\text{mL} \times$<br>$\text{g protein}^{-1} \times$<br>$\text{min}^{-1}$ ] | Stereoselectivity              |                                  |                                 |
|-------------|------------------------------|-------------------------------------------|----------------------------------------------------------------------------------------------------------------------|-------------------------------------------------------------------------------------------------------------------|--------------------------------|----------------------------------|---------------------------------|
|             |                              |                                           |                                                                                                                      |                                                                                                                   | $K_m$                          | $V_{\max}$                       | $Cl_{\text{int}}$               |
| NET         | ( <i>R</i> )-Bisnorephedrine | 0.206<br>$\pm 0.184$                      | 9.50<br>$\pm 1.39$                                                                                                   | 46.1<br>$\pm 48.0$                                                                                                | 1.01-fold<br>for ( <i>R</i> )  | 1.23-fold<br>for ( <i>S</i> )    | 1.24-fold<br>for ( <i>S</i> )   |
|             | ( <i>S</i> )-Bisnorephedrine | 0.204<br>$\pm 0.157$                      | 11.7<br>$\pm 1.47$                                                                                                   | 57.4<br>$\pm 51.3$                                                                                                |                                |                                  |                                 |
|             | Halostachine-1               | No saturable net uptake                   |                                                                                                                      |                                                                                                                   |                                |                                  |                                 |
|             | Halostachine-2               |                                           |                                                                                                                      |                                                                                                                   |                                |                                  |                                 |
|             | Norphenylephrine-1           | 2.25<br>$\pm 0.42$                        | 426<br>$\pm 13.1$                                                                                                    | 189<br>$\pm 41.2$                                                                                                 | 1.03-fold<br>for 2             | 1.25-fold<br>for 2**             | 1.21-fold<br>for 2              |
|             | Norphenylephrine-2           | 2.31<br>$\pm 0.40$                        | 531<br>$\pm 15.1$                                                                                                    | 230<br>$\pm 46.1$                                                                                                 |                                |                                  |                                 |
|             | ( <i>R</i> )-Phenylephrine   | 5.12<br>$\pm 0.95$                        | 392<br>$\pm 12.12$                                                                                                   | 75.5<br>$\pm 16.2$                                                                                                | 1.03-fold<br>for ( <i>S</i> )  | 1.79-fold<br>for ( <i>R</i> )*** | 1.43-fold<br>for ( <i>R</i> )   |
|             | ( <i>S</i> )-Phenylephrine   | 4.16<br>$\pm 1.07$                        | 220<br>$\pm 9.26$                                                                                                    | 52.3<br>$\pm 15.6$                                                                                                |                                |                                  |                                 |
|             | ( <i>R</i> )-Octopamine      | 2.86<br>$\pm 0.35$                        | 476<br>$\pm 9.68$                                                                                                    | 166<br>$\pm 23.4$                                                                                                 | 1.55-fold<br>for ( <i>R</i> )* | 1.30-fold<br>for ( <i>R</i> )*** | 1.19-fold<br>for ( <i>S</i> )   |
|             | ( <i>S</i> )-Octopamine      | 1.85<br>$\pm 0.21$                        | 366<br>$\pm 6.91$                                                                                                    | 198<br>$\pm 26.7$                                                                                                 |                                |                                  |                                 |
|             | ( <i>R</i> )-Synephrine      | 7.33<br>$\pm 2.86$                        | 273<br>$\pm 17.9$                                                                                                    | 37.3<br>$\pm 17.0$                                                                                                | 2.61-fold<br>for ( <i>S</i> )  | 1.80-fold<br>for ( <i>R</i> )**  | 4.70-fold<br>for ( <i>R</i> )   |
|             | ( <i>S</i> )-Synephrine      | 19.1<br>$\pm 8.97$                        | 151<br>$\pm 13.4$                                                                                                    | 7.92<br>$\pm 4.42$                                                                                                |                                |                                  |                                 |
|             | Normetanephrine-1            | 36.6<br>$\pm 13.5$                        | 99.4<br>$\pm 17.0$                                                                                                   | 2.71<br>$\pm 1.47$                                                                                                | 1.35-fold<br>for 1             | 1.06-fold<br>for 1               | 1.28-fold<br>for 2              |
|             | Normetanephrine-2            | 26.2<br>$\pm 9.53$                        | 94.2<br>$\pm 13.7$                                                                                                   | 3.47<br>$\pm 1.72$                                                                                                |                                |                                  |                                 |
|             | Metanephrine-1               | No saturable net uptake                   |                                                                                                                      |                                                                                                                   |                                |                                  |                                 |
|             | Metanephrine-2               |                                           |                                                                                                                      |                                                                                                                   |                                |                                  |                                 |
|             | Salsolinol-1                 | 90.1<br>$\pm 33.3$                        | 112<br>$\pm 20.1$                                                                                                    | 1.24<br>$\pm 0.69$                                                                                                | 1.13-fold<br>for 2             | 1.35-fold<br>for 2               | 1.19-fold<br>for 2              |
|             | Salsolinol-2                 | 102<br>$\pm 35.8$                         | 151<br>$\pm 27.9$                                                                                                    | 1.48<br>$\pm 0.79$                                                                                                |                                |                                  |                                 |
| DAT         | ( <i>R</i> )-Bisnorephedrine | 4.38<br>$\pm 2.91$                        | 27.2<br>$\pm 6.49$                                                                                                   | 6.21<br>$\pm 5.61$                                                                                                | 1.18-fold<br>for ( <i>S</i> )  | 1.17-fold<br>for ( <i>S</i> )    | 1.01-fold<br>for ( <i>R</i> )   |
|             | ( <i>S</i> )-Bisnorephedrine | 5.16<br>$\pm 3.59$                        | 31.7<br>$\pm 8.4$                                                                                                    | 6.15<br>$\pm 5.91$                                                                                                |                                |                                  |                                 |
|             | Halostachine-1               | No saturable net uptake                   |                                                                                                                      |                                                                                                                   |                                |                                  |                                 |
|             | Halostachine-2               |                                           |                                                                                                                      |                                                                                                                   |                                |                                  |                                 |
|             | Norphenylephrine-1           | 15.6<br>$\pm 2.47$                        | 2003<br>$\pm 64.5$                                                                                                   | 128<br>$\pm 24.5$                                                                                                 | 1.20-fold<br>for 2             | 1.55-fold<br>for 2***            | 1.29-fold<br>for 2              |
|             | Norphenylephrine-2           | 18.6<br>$\pm 2.99$                        | 3103<br>$\pm 104$                                                                                                    | 167<br>$\pm 32.3$                                                                                                 |                                |                                  |                                 |
|             | ( <i>R</i> )-Phenylephrine   | 35.6<br>$\pm 6.13$                        | 613<br>$\pm 25.2$                                                                                                    | 17.2<br>$\pm 3.68$                                                                                                | 1.06-fold<br>for ( <i>R</i> )  | 1.56-fold<br>for ( <i>R</i> )*** | 1.48-fold<br>for ( <i>R</i> )   |
|             | ( <i>S</i> )-Phenylephrine   | 33.7<br>$\pm 8.37$                        | 392<br>$\pm 22.9$                                                                                                    | 11.6<br>$\pm 3.57$                                                                                                |                                |                                  |                                 |
|             | ( <i>R</i> )-Octopamine      | 20.5<br>$\pm 3.22$                        | 2054<br>$\pm 68.2$                                                                                                   | 100<br>$\pm 19.1$                                                                                                 | 1.05-fold<br>for ( <i>R</i> )  | 1.05-fold<br>for ( <i>R</i> )    | 1.00-fold<br>for ( <i>R/S</i> ) |
|             | ( <i>S</i> )-Octopamine      | 19.6<br>$\pm 4.06$                        | 1959<br>$\pm 85.2$                                                                                                   | 100<br>$\pm 25.0$                                                                                                 |                                |                                  |                                 |

| Transporter | Substrate           | $K_m \pm \text{SEM}$<br>[ $\mu\text{M}$ ] | $V_{\max} \pm \text{SEM}$<br>[ $\text{pmol} \times \text{mg}$<br>$\text{protein}^{-1} \times$<br>$\text{min}^{-1}$ ] | $\text{CI}_{\text{int}} \pm \text{SEM}$<br>[ $\text{mL} \times$<br>$\text{g protein}^{-1} \times$<br>$\text{min}^{-1}$ ] | Stereoselectivity    |                         |                          |
|-------------|---------------------|-------------------------------------------|----------------------------------------------------------------------------------------------------------------------|--------------------------------------------------------------------------------------------------------------------------|----------------------|-------------------------|--------------------------|
|             |                     |                                           |                                                                                                                      |                                                                                                                          | $K_m$                | $V_{\max}$              | $\text{CI}_{\text{int}}$ |
| DAT         | (R)-Synephrine      | 36.8<br>$\pm 6.85$                        | 849<br>$\pm 34.0$                                                                                                    | 23.1<br>$\pm 5.22$                                                                                                       | 1.21-fold<br>for (S) | 1.84-fold<br>for (R)*** | 2.23-fold<br>for (R)     |
|             | (S)-Synephrine      | 44.7<br>$\pm 9.23$                        | 463<br>$\pm 21.8$                                                                                                    | 10.4<br>$\pm 2.63$                                                                                                       |                      |                         |                          |
|             | Normetanephrine-1   | No saturable net uptake                   |                                                                                                                      |                                                                                                                          |                      |                         |                          |
|             | Normetanephrine-2   |                                           |                                                                                                                      |                                                                                                                          |                      |                         |                          |
|             | Metanephrine-1      | No saturable net uptake                   |                                                                                                                      |                                                                                                                          |                      |                         |                          |
|             | Metanephrine-2      |                                           |                                                                                                                      |                                                                                                                          |                      |                         |                          |
|             | Salsolinol-1        | No saturable net uptake                   |                                                                                                                      |                                                                                                                          |                      |                         |                          |
|             | Salsolinol-2        |                                           |                                                                                                                      |                                                                                                                          |                      |                         |                          |
| SERT        | (R)-Bisnorephedrine | No saturable net uptake                   |                                                                                                                      |                                                                                                                          |                      |                         |                          |
|             | (S)-Bisnorephedrine |                                           |                                                                                                                      |                                                                                                                          |                      |                         |                          |
|             | Halostachine-1      | No saturable net uptake                   |                                                                                                                      |                                                                                                                          |                      |                         |                          |
|             | Halostachine-2      |                                           |                                                                                                                      |                                                                                                                          |                      |                         |                          |
|             | Norphenylephrine-1  | 333<br>$\pm 106$                          | 400<br>$\pm 64.9$                                                                                                    | 1.20<br>$\pm 0.58$                                                                                                       | 1.20-fold<br>for 1   | 1.27-fold<br>for 2      | 1.53-fold<br>for 2       |
|             | Norphenylephrine-2  | 277<br>$\pm 68.7$                         | 508<br>$\pm 59.5$                                                                                                    | 1.83<br>$\pm 0.67$                                                                                                       |                      |                         |                          |
|             | (R)-Phenylephrine   | 328<br>$\pm 106$                          | 356<br>$\pm 59.4$                                                                                                    | 17.2<br>$\pm 3.68$                                                                                                       | 1.89-fold<br>for (R) | 1.49-fold<br>for (S)*   | 2.82-fold<br>for (S)*    |
|             | (S)-Phenylephrine   | 173<br>$\pm 20.6$                         | 529<br>$\pm 26.5$                                                                                                    | 11.6<br>$\pm 3.57$                                                                                                       |                      |                         |                          |
|             | (R)-Octopamine      | 59.6<br>$\pm 11.3$                        | 247<br>$\pm 12.6$                                                                                                    | 4.14<br>$\pm 1.00$                                                                                                       | 1.39-fold<br>for (R) | 2.38-fold<br>for (R)*** | 1.71-fold<br>for (R)     |
|             | (S)-Octopamine      | 42.9<br>$\pm 14.2$                        | 104<br>$\pm 8.39$                                                                                                    | 2.42<br>$\pm 1.00$                                                                                                       |                      |                         |                          |
|             | (R)-Synephrine      | 528<br>$\pm 440$                          | 363<br>$\pm 182$                                                                                                     | 0.69<br>$\pm 0.92$                                                                                                       | 1.52-fold<br>for (S) | 1.35-fold<br>for (S)    | 1.13-fold<br>for (R)     |
|             | (S)-Synephrine      | 804<br>$\pm 868$                          | 491<br>$\pm 364$                                                                                                     | 0.61<br>$\pm 1.11$                                                                                                       |                      |                         |                          |
|             | Normetanephrine-1   | 42.0<br>$\pm 12.5$                        | 93.6<br>$\pm 13.4$                                                                                                   | 2.23<br>$\pm 0.98$                                                                                                       | 1.08-fold<br>for 1   | 1.67-fold<br>for 2*     | 1.28-fold<br>for 2       |
|             | Normetanephrine-2   | 38.7<br>$\pm 6.62$                        | 157<br>$\pm 12.5$                                                                                                    | 4.05<br>$\pm 1.01$                                                                                                       |                      |                         |                          |
|             | Metanephrine-1      | 151<br>$\pm 165$                          | 87.4<br>$\pm 57.3$                                                                                                   | 0.58<br>$\pm 1.01$                                                                                                       | 1.09-fold<br>for 1   | 1.08-fold<br>for 2      | 1.01-fold<br>for 1       |
|             | Metanephrine-2      | 165<br>$\pm 152$                          | 94.5<br>$\pm 53.6$                                                                                                   | 0.57<br>$\pm 0.85$                                                                                                       |                      |                         |                          |
|             | Salsolinol-1        | 129<br>$\pm 26.0$                         | 229<br>$\pm 23.4$                                                                                                    | 1.77<br>$\pm 0.54$                                                                                                       | 1.85-fold<br>for 2   | 1.34-fold<br>for 1      | 2.48-fold<br>for 1       |
|             | Salsolinol-2        | 239<br>$\pm 65.6$                         | 171<br>$\pm 29.0$                                                                                                    | 0.71<br>$\pm 0.32$                                                                                                       |                      |                         |                          |
| OCT1        | (R)-Bisnorephedrine | 187<br>$\pm 151$                          | 218<br>$\pm 71.7$                                                                                                    | 1.17<br>$\pm 1.33$                                                                                                       | 1.15-for<br>for (R)  | 1.19-fold<br>for (R)    | 1.03-fold<br>for (R)     |
|             | (S)-Bisnorephedrine | 162<br>$\pm 130$                          | 184<br>$\pm 56.4$                                                                                                    | 1.13<br>1.25                                                                                                             |                      |                         |                          |
|             | Halostachine-1      | No saturable net uptake                   |                                                                                                                      |                                                                                                                          |                      |                         |                          |
|             | Halostachine-2      |                                           |                                                                                                                      |                                                                                                                          |                      |                         |                          |

| Transporter | Substrate           | $K_m \pm \text{SEM}$<br>[ $\mu\text{M}$ ] | $V_{\max} \pm \text{SEM}$<br>[ $\text{pmol} \times \text{mg}$<br>$\text{protein}^{-1} \times$<br>$\text{min}^{-1}$ ] | $Cl_{\text{int}} \pm \text{SEM}$<br>[ $\text{mL} \times$<br>$\text{g protein}^{-1} \times$<br>$\text{min}^{-1}$ ] | Stereoselectivity     |                         |                      |
|-------------|---------------------|-------------------------------------------|----------------------------------------------------------------------------------------------------------------------|-------------------------------------------------------------------------------------------------------------------|-----------------------|-------------------------|----------------------|
|             |                     |                                           |                                                                                                                      |                                                                                                                   | $K_m$                 | $V_{\max}$              | $Cl_{\text{int}}$    |
| OCT1        | Norphenylephrine-1  | 175<br>$\pm 46.0$                         | 1710<br>$\pm 177$                                                                                                    | 4.02<br>$\pm 1.76$                                                                                                | 1.03-fold<br>for 1    | 1.08-fold<br>for 1      | 1.05-fold<br>for 1   |
|             | Norphenylephrine-2  | 178<br>$\pm 49.1$                         | 1578<br>$\pm 172$                                                                                                    | 3.84<br>$\pm 1.75$                                                                                                |                       |                         |                      |
|             | (R)-Phenylephrine   | 175<br>$\pm 46.0$                         | 1710<br>$\pm 177$                                                                                                    | 9.79<br>$\pm 3.59$                                                                                                | 1.02-fold<br>for (S)  | 1.08-fold<br>for (R)    | 1.11-fold<br>for (R) |
|             | (S)-Phenylephrine   | 178<br>$\pm 49.1$                         | 1578<br>$\pm 172$                                                                                                    | 8.85<br>$\pm 3.40$                                                                                                |                       |                         |                      |
|             | (R)-Octopamine      | 291<br>$\pm 56.6$                         | 1318<br>$\pm 85.3$                                                                                                   | 4.53<br>$\pm 1.17$                                                                                                | 1.04-fold<br>for (R)  | 1.09-fold<br>for (R)    | 1.05-fold<br>for (R) |
|             | (S)-Octopamine      | 281<br>$\pm 61.2$                         | 1211<br>$\pm 86.7$                                                                                                   | 4.32<br>$\pm 1.25$                                                                                                |                       |                         |                      |
|             | (R)-Synephrine      | 86.7<br>$\pm 11.0$                        | 1817<br>$\pm 65.7$                                                                                                   | 21.0<br>$\pm 3.42$                                                                                                | 1.28-fold<br>for (S)  | 1.35-fold<br>for (R)**  | 1.73-fold<br>for (R) |
|             | (S)-Synephrine      | 111<br>$\pm 18.4$                         | 1348<br>$\pm 70.5$                                                                                                   | 12.1<br>$\pm 2.65$                                                                                                |                       |                         |                      |
|             | Normetanephrine-1   | 1279<br>$\pm 869$                         | 3145<br>$\pm 1530$                                                                                                   | 2.46<br>$\pm 2.87$                                                                                                | 1.59-fold<br>for 1    | 1.47-fold<br>for 1      | 1.08-fold<br>for 2   |
|             | Normetanephrine-2   | 806<br>$\pm 394$                          | 2137<br>$\pm 669$                                                                                                    | 2.65<br>$\pm 2.13$                                                                                                |                       |                         |                      |
|             | Metanephrine-1      | 134<br>$\pm 48.4$                         | 1082<br>$\pm 139$                                                                                                    | 8.09<br>$\pm 3.96$                                                                                                | 1.09-fold<br>for 2    | 1.06-fold<br>for 1      | 1.16-fold<br>for 1   |
|             | Metanephrine-2      | 146<br>$\pm 50.9$                         | 1018<br>$\pm$                                                                                                        | 6.97<br>$\pm 3.32$                                                                                                |                       |                         |                      |
|             | Salsolinol-1        | 133<br>$\pm 68.3$                         | 1450<br>$\pm 429$                                                                                                    | 10.9<br>$\pm 8.84$                                                                                                | 1.02-fold<br>for 1    | 1.02-fold<br>for 1      | 1.00-fold<br>for 1/2 |
|             | Salsolinol-2        | 131<br>$\pm 71.2$                         | 1426<br>$\pm 444$                                                                                                    | 10.9<br>$\pm 9.4$                                                                                                 |                       |                         |                      |
| OCT2        | (R)-Bisnorephedrine | 37.5<br>$\pm 11.4$                        | 847<br>$\pm 60.9$                                                                                                    | 22.6<br>$\pm 8.50$                                                                                                | 1.61-fold<br>for (S)  | 1.41-fold<br>for (R)*   | 2.27-fold<br>for (R) |
|             | (S)-Bisnorephedrine | 60.4<br>$\pm 18.2$                        | 602<br>$\pm 48.8$                                                                                                    | 10.0<br>$\pm 3.81$                                                                                                |                       |                         |                      |
|             | Halostachine-1      | 12.8<br>$\pm 14.3$                        | 329<br>$\pm 70.0$                                                                                                    | 25.7<br>$\pm 34.0$                                                                                                | 1.50-fold<br>for (S)  | 1.26-fold<br>for (R)    | 1.89-fold<br>for (R) |
|             | Halostachine-2      | 19.3<br>$\pm 23.7$                        | 261<br>$\pm 66.3$                                                                                                    | 13.6<br>$\pm 20.2$                                                                                                |                       |                         |                      |
|             | Norphenylephrine-1  | 911<br>$\pm 88.7$                         | 33143<br>$\pm 1628$                                                                                                  | 36.4<br>$\pm 5.33$                                                                                                | 1.57-fold<br>for 1*   | 2.19-fold<br>for 1***   | 1.40-fold<br>for 1   |
|             | Norphenylephrine-2  | 582<br>$\pm 63.7$                         | 15157<br>$\pm 712$                                                                                                   | 26.07<br>$\pm 4.08$                                                                                               |                       |                         |                      |
|             | (R)-Phenylephrine   | 212<br>$\pm 72.9$                         | 6263<br>$\pm 914$                                                                                                    | 29.5<br>$\pm 11.4$                                                                                                | 1.89-fold<br>for (R)  | 2.04-fold<br>for (R)*   | 1.02-fold<br>for (S) |
|             | (S)-Phenylephrine   | 112<br>$\pm 36.7$                         | 3068<br>$\pm 332$                                                                                                    | 27.3<br>$\pm 11.9$                                                                                                |                       |                         |                      |
|             | (R)-Octopamine      | 636<br>$\pm 83.6$                         | 25182<br>$\pm 1468$                                                                                                  | 39.6<br>$\pm 7.52$                                                                                                | 1.63-fold<br>for (R)* | 2.14-fold<br>for (R)*** | 1.31-fold<br>for (R) |
|             | (S)-Octopamine      | 281<br>$\pm 61.2$                         | 11762<br>$\pm 378$                                                                                                   | 30.2<br>$\pm 3.6$                                                                                                 |                       |                         |                      |
|             | (R)-Synephrine      | 443<br>$\pm 154$                          | 10877<br>$\pm 2130$                                                                                                  | 24.6<br>$\pm 13.3$                                                                                                | 2.07-fold<br>for (R)  | 2.05-fold<br>for (R)    | 1.01-fold<br>for (S) |
|             | (S)-Synephrine      | 214<br>$\pm 76.2$                         | 5307<br>$\pm 807$                                                                                                    | 24.8<br>$\pm 12.6$                                                                                                |                       |                         |                      |
|             | Normetanephrine-1   | 613<br>$\pm 93.9$                         | 5665<br>$\pm 491$                                                                                                    | 9.24<br>$\pm 2.22$                                                                                                | 1.32-fold<br>for 1    | 2.06-fold<br>for 2*     | 1.56-fold<br>for 1   |
|             | Normetanephrine-2   | 464<br>$\pm 227$                          | 2747<br>$\pm 686$                                                                                                    | 5.92<br>$\pm 4.37$                                                                                                |                       |                         |                      |
|             | Metanephrine-1      | 54.7<br>$\pm 22.0$                        | 1127<br>$\pm 118$                                                                                                    | 20.6<br>$\pm 10.4$                                                                                                | 1.25-fold<br>for 2    | 2.13-fold<br>for 1*     | 2.66-fold<br>for 1   |
|             | Metanephrine-2      | 68.1<br>$\pm 30.7$                        | 528<br>$\pm 66.3$                                                                                                    | 7.75<br>$\pm 4.46$                                                                                                |                       |                         |                      |

| Transporter         | Substrate           | K <sub>m</sub> ± SEM<br>[μM] | V <sub>max</sub> ± SEM<br>[pmol × mg<br>protein <sup>-1</sup> ×<br>min <sup>-1</sup> ] | Cl <sub>int</sub> ± SEM<br>[mL ×<br>g protein <sup>-1</sup> ×<br>min <sup>-1</sup> ] | Stereoselectivity    |                         |                      |
|---------------------|---------------------|------------------------------|----------------------------------------------------------------------------------------|--------------------------------------------------------------------------------------|----------------------|-------------------------|----------------------|
|                     |                     |                              |                                                                                        |                                                                                      | K <sub>m</sub>       | V <sub>max</sub>        | Cl <sub>int</sub>    |
| OCT2                | Salsolinol-1        | 222<br>± 93.6                | 9083<br>± 1659                                                                         | 40.9<br>± 24.7                                                                       | 1.04-fold<br>for 1   | 1.01-fold<br>for 2      | 1.05-fold<br>for 2   |
|                     | Salsolinol-2        | 213<br>± 89.3                | 9160<br>± 1634                                                                         | 42.7<br>± 25.6                                                                       |                      |                         |                      |
|                     | (R)-Bisnorephedrine | 165<br>± 83.3                | 662<br>± 126                                                                           | 4.00<br>± 2.77                                                                       | 1.08-fold<br>for (R) | 1.13-fold<br>for (R)    | 1.04-fold<br>for (R) |
| (S)-Bisnorephedrine | 153<br>± 78.4       | 589<br>± 111                 | 3.85<br>± 2.70                                                                         |                                                                                      |                      |                         |                      |
| OCT3                | Halostachine-1      | No saturable net uptake      |                                                                                        |                                                                                      |                      |                         |                      |
|                     | Halostachine-2      |                              |                                                                                        |                                                                                      |                      |                         |                      |
|                     | Norphenylephrine-1  | 582<br>± 162                 | 6412<br>± 767                                                                          | 11.0<br>± 4.39                                                                       | 1.17-fold<br>for 1   | 3.88-fold<br>for 1**    | 3.32-fold<br>for 1   |
|                     | Norphenylephrine-2  | 498<br>± 165                 | 1654<br>± 222                                                                          | 3.32<br>± 1.54                                                                       |                      |                         |                      |
|                     | (R)-Phenylephrine   | 244<br>± 56.9                | 2885<br>± 303                                                                          | 11.8<br>± 3.99                                                                       | 1.19-fold<br>for (R) | 3.33-fold<br>for (R)*** | 2.79-fold<br>for (R) |
|                     | (S)-Phenylephrine   | 205<br>± 56.1                | 866<br>± 99.5                                                                          | 4.23<br>± 1.64                                                                       |                      |                         |                      |
|                     | (R)-Octopamine      | 25.1<br>± 7.01               | 972<br>± 54.2                                                                          | 38.8<br>± 13.0                                                                       | 1.38-fold<br>for (S) | 1.10-fold<br>for (S)    | 1.38-fold<br>for (S) |
|                     | (S)-Octopamine      | 20.1<br>± 7.68               | 1072<br>± 77.1                                                                         | 53.4<br>± 24.2                                                                       |                      |                         |                      |
|                     | (R)-Synephrine      | 83.5<br>± 19.5               | 2193<br>± 153                                                                          | 26.3<br>± 8.00                                                                       | 1.11-fold<br>for (R) | 1.05-fold<br>for (R)    | 1.06-fold<br>for (S) |
|                     | (S)-Synephrine      | 75.3<br>± 16.7               | 2090<br>± 133                                                                          | 27.8<br>± 7.93                                                                       |                      |                         |                      |
|                     | Normetanephrine-1   | 75.9<br>± 32.7               | 1473<br>± 175                                                                          | 19.4<br>± 10.7                                                                       | 1.22-fold<br>for 1   | 1.09-fold<br>for 1      | 1.12-fold<br>for 2   |
|                     | Normetanephrine-2   | 62.4<br>± 27.4               | 1352<br>± 161                                                                          | 21.6<br>± 12.1                                                                       |                      |                         |                      |
|                     | Metanephrine-1      | 29.0<br>± 13.9               | 752<br>± 80.6                                                                          | 25.9<br>± 15.2                                                                       | 1.19-fold<br>for 1   | 1.19-fold<br>for 1      | 1.00-fold<br>for 1/2 |
|                     | Metanephrine-2      | 24.4<br>± 12.3               | 635<br>± 68.6                                                                          | 26.0<br>± 15.8                                                                       |                      |                         |                      |
|                     | Salsolinol-1        | 186<br>± 88.8                | 705<br>± 133                                                                           | 3.80<br>± 2.52                                                                       | 1.20-fold<br>for 2   | 1.01-fold<br>for 1      | 1.21-fold<br>for 1   |
|                     | Salsolinol-2        | 222<br>± 90.9                | 697<br>± 122                                                                           | 3.15<br>± 1.84                                                                       |                      |                         |                      |

SEM, standard error of the mean; asterisks indicate statistical significance of the differences between the two enantiomers (Student's *t*-test; \**p* < 0.05, \*\**p* < 0.01, \*\*\**p* < 0.001).

**Table S4** Stereoselectivity and transporter selectivity of investigated phenylethylamines for OCT2 and its A270S variant

| Substrate        | Stereoselectivity               |                                 | Transporter selectivity       |                        |
|------------------|---------------------------------|---------------------------------|-------------------------------|------------------------|
|                  | OCT2_WT                         | OCT2_A270S                      |                               |                        |
| Bisnorephedrine  | 1.10-fold<br>for ( <i>R</i> )   | 1.09-fold<br>for ( <i>S</i> )   | ( <i>R</i> )-Bisnorephedrine  | 1.50-fold<br>for WT    |
|                  |                                 |                                 | ( <i>S</i> )-Bisnorephedrine  | 1.24-fold<br>for WT    |
| Epinephrine      | 1.81-fold<br>for ( <i>R</i> )*  | 1.93-fold<br>for ( <i>R</i> )** | ( <i>R</i> )-Epinephrine      | 1.19-fold<br>for WT    |
|                  |                                 |                                 | ( <i>S</i> )-Epinephrine      | 1.19-fold<br>for WT    |
| Halostachine     | 1.42-fold<br>for ( <i>R</i> )   | 1.32-fold<br>for ( <i>R</i> )   | ( <i>R</i> )-Halostachine     | 1.02-fold<br>for WT    |
|                  |                                 |                                 | ( <i>S</i> )-Halostachine     | 1.05-fold<br>for A270S |
| Metanephrine     | 2.78-fold<br>for ( <i>R</i> )** | 2.26-fold<br>for ( <i>R</i> )** | ( <i>R</i> )-Metanephrine     | 1.20-fold<br>for A270S |
|                  |                                 |                                 | ( <i>S</i> )-Metanephrine     | 1.47-fold<br>for A270S |
| Norepinephrine   | 2.05-fold<br>for ( <i>R</i> )*  | 2.06-fold<br>for ( <i>R</i> )*  | ( <i>R</i> )-Norepinephrine   | 1.21-fold<br>for WT    |
|                  |                                 |                                 | ( <i>S</i> )-Norepinephrine   | 1.22-fold<br>for WT    |
| Normetanephrine  | 1.91-fold<br>for ( <i>R</i> )** | 1.70-fold<br>for ( <i>R</i> )** | ( <i>R</i> )-Normetanephrine  | 1.21-fold<br>for WT    |
|                  |                                 |                                 | ( <i>S</i> )-Normetanephrine  | 1.08-fold<br>for WT    |
| Norphenylephrine | 1.54-fold<br>for ( <i>R</i> )** | 1.46-fold<br>for ( <i>R</i> )** | ( <i>R</i> )-Norphenylephrine | 1.18-fold<br>for WT**  |
|                  |                                 |                                 | ( <i>S</i> )-Norphenylephrine | 1.12-fold<br>for WT*   |
| Octopamine       | 1.74-fold<br>for ( <i>R</i> )** | 1.69-fold<br>for ( <i>R</i> )** | ( <i>R</i> )-Octopamine       | 1.20-fold<br>for WT    |
|                  |                                 |                                 | ( <i>S</i> )-Octopamine       | 1.17-fold<br>for WT    |
| Phenylephrine    | 1.30-fold<br>for ( <i>R</i> )*  | 1.16-fold<br>for ( <i>R</i> )   | ( <i>R</i> )-Phenylephrine    | 1.27-fold<br>for WT*   |
|                  |                                 |                                 | ( <i>S</i> )-Phenylephrine    | 1.13-fold<br>for WT    |
| Salsolinol       | 1.06-fold<br>for ( <i>S</i> )   | 1.10-fold<br>for ( <i>S</i> )   | ( <i>R</i> )-Salsolinol       | 1.50-fold<br>for WT*   |
|                  |                                 |                                 | ( <i>S</i> )-Salsolinol       | 1.45-fold<br>for WT**  |
| Synephrine       | 1.17-fold<br>for ( <i>R</i> )   | 1.00-fold<br>for ( <i>R</i> )   | ( <i>R</i> )-Synephrine       | 1.41-fold<br>for WT*   |
|                  |                                 |                                 | ( <i>S</i> )-Synephrine       | 1.20-fold<br>for WT    |

Asterisks indicate statistical significance of the differences between the two enantiomers or between the uptake by OCT2 wildtype compared to the uptake by the OCT2 A270S variant (Student's *t*-test; \**p* < 0.05, \*\**p* < 0.01, \*\*\**p* < 0.001).
